# Supplementary material for: Biodegradation Studies of Polyhydroxybutyrate and Polyhydroxybutyrate-co-Polyhydroxyvalerate Films in Soil
Source: MDPI journal article supplement (doi:10.3390/ijms24087638), 2023-04-21
Supplement: s1 [file s1]

# Biodegradation Studies of Polyhydroxybutyrate and Polyhydroxybutyrate-co-Polyhydroxyvalerate Films in Soil

Jihyeon Kim <sup>1,2,†</sup>, Nevin S. Gupta <sup>1,†</sup>, Lindsey B. Bezek <sup>1</sup>, Jacqueline Linn <sup>1</sup>, Karteek K. Bejagam <sup>3</sup>, Shounak Banerjee <sup>4</sup>, Joseph H. Dumont <sup>1</sup>, Sang Yong Nam <sup>2</sup>, Hyun Woo Kang <sup>5</sup>, Chi Hoon Park <sup>5</sup>, Ghanshyam Pilania <sup>3,6</sup>, Carl N. Iverson <sup>1</sup>, Babetta L. Marrone <sup>4</sup> and Kwan-Soo Lee <sup>1,\*</sup>

<sup>1</sup> Chemistry Division, Los Alamos National Laboratory, Los Alamos, NM 87545, USA

<sup>2</sup> Department of Materials Engineering and Convergence Technology, Gyeongsang National University, Jinju 52828, Republic of Korea

<sup>3</sup> Materials Science and Technology Division, Los Alamos National Laboratory, Los Alamos, NM 87545, USA

<sup>4</sup> Bioscience Division, Los Alamos National Laboratory, Los Alamos, NM 87545, USA

<sup>5</sup> Department of Energy Engineering, Future Convergence Technology Research Institute, Gyeongsang National University, Jinju 52725, Korea

<sup>6</sup> General Electric Global Research Center, Niskayuna, NY 12309, USA

\* Correspondence: kslee@lanl.gov; Tel.: +1-(505)-667-3060

† These authors contributed equally to this work.

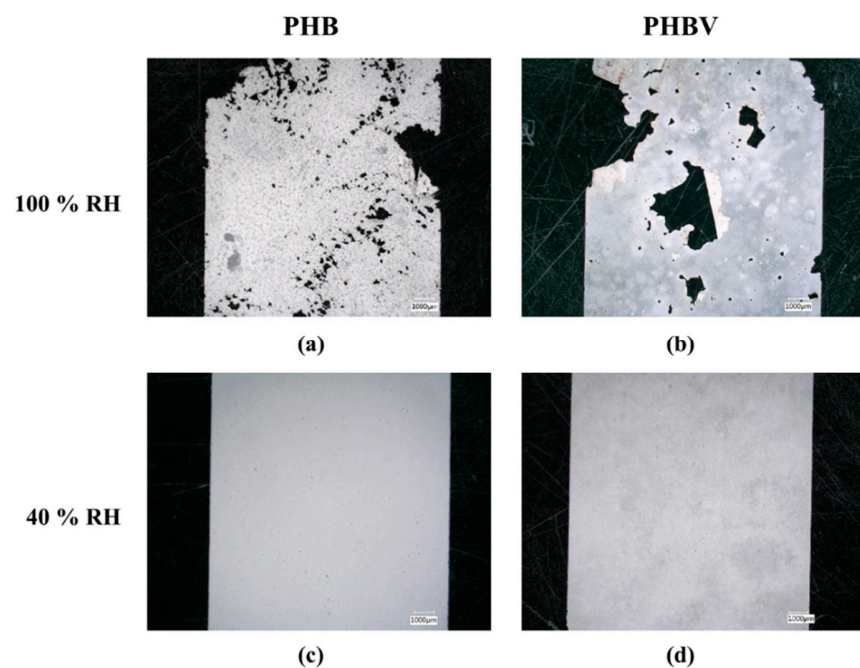

**Supplemental Figure S1.** The microscope images of PHB and PHBV with 7 days under 100% RH and 6 weeks under 40% RH soil conditions: (a) PHB and (b) PHBV in soil saturated with water (100% RH) for 7 days and (c) PHB and (d) PHBV in soil 40% RH for 6 weeks.

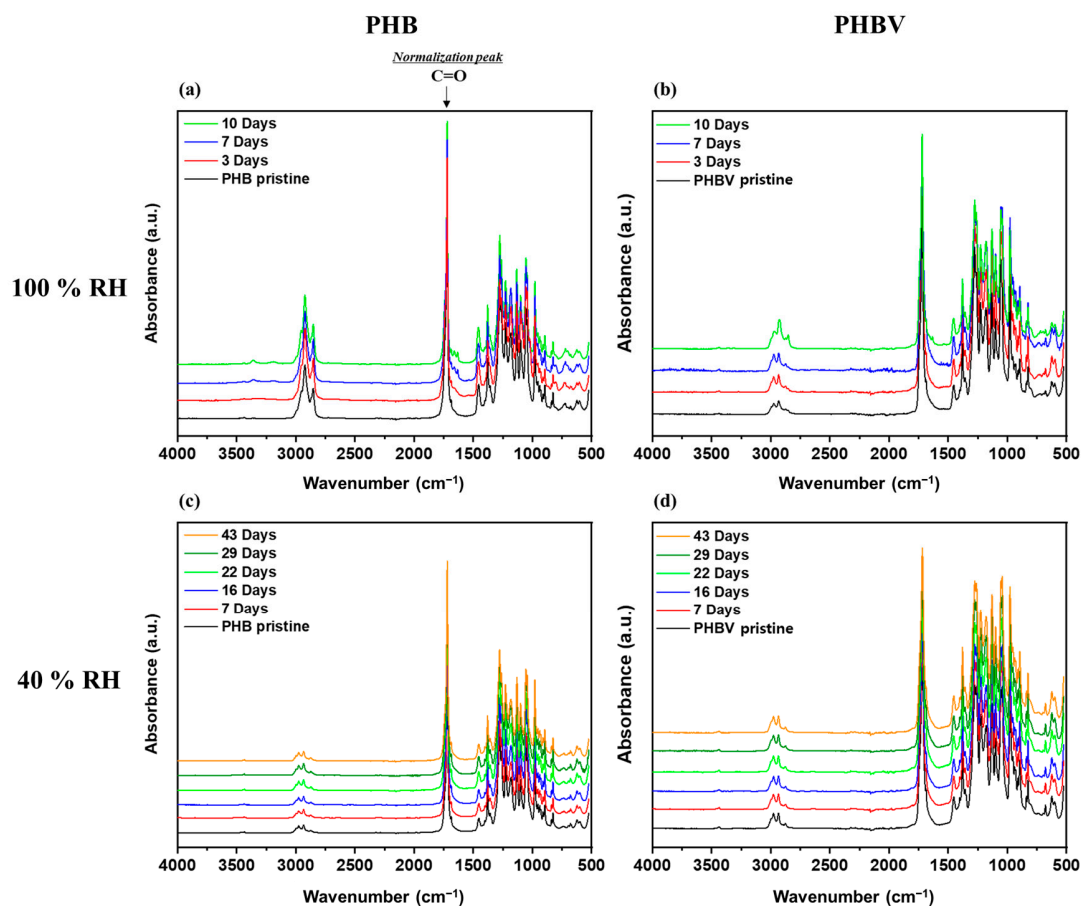

**Supplemental Figure S2.** FT-IR of PHB and PHBV after being aged in two different soil conditions: (a) PHB and (b) PHBV in soil saturated with water (100% RH) and (c) PHB and (d) PHBV in soil 40% RH.

**Supplemental Table S1.** FT-IR peak assignments of PHB and PHBV.

| Position of peak (cm <sup>-1</sup> ) | Chemical group           |
|--------------------------------------|--------------------------|
| 3550-3200                            | O-H stretching           |
| 3020-2840                            | C-H stretching           |
| 1720                                 | C=O stretching           |
| 1453                                 | -CH <sub>2</sub> bending |
| 1380                                 | -CH <sub>3</sub> bending |
| 1276-1179, 1054-1043                 | C-O stretching           |
| 1021                                 | C-OH stretching          |

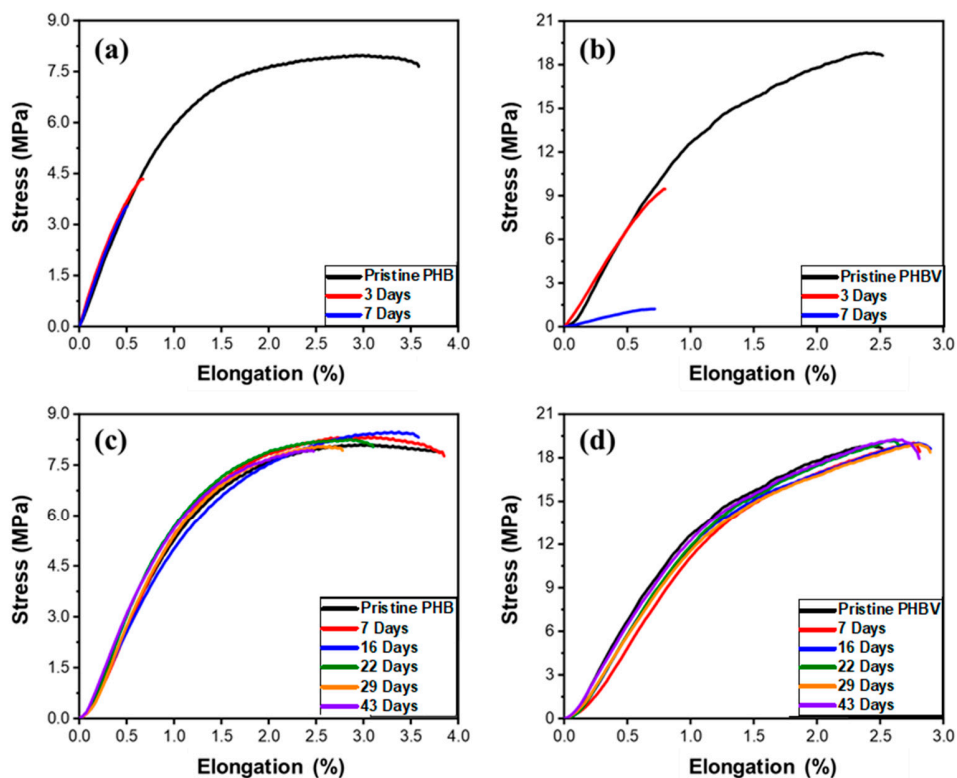

**Supplemental Figure S3.** Stress-strain curve of PHB and PHBV after being aged in two different soil conditions: (a) PHB and (b) PHBV in soil saturated with water (100% RH), (c) PHB and (d) PHBV in soil with 40% RH.

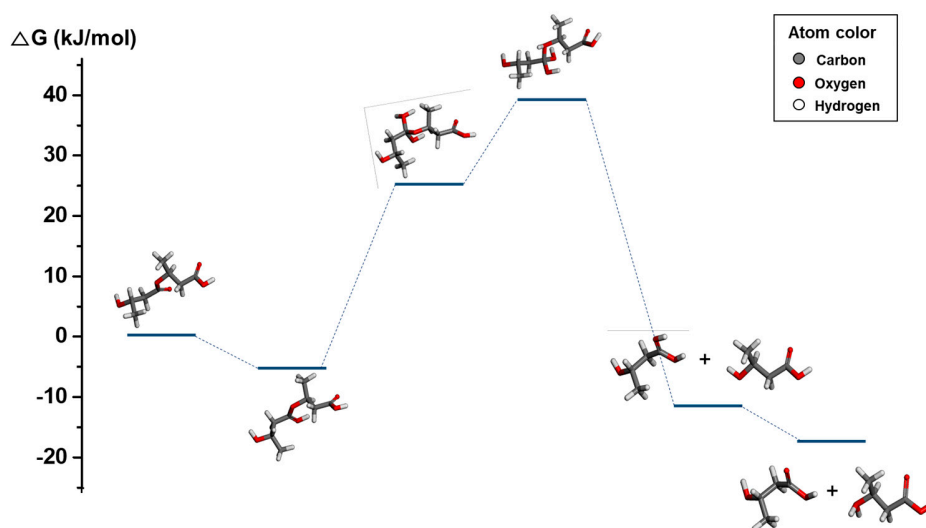

**Supplemental Figure S4.** The Density Functional Theory (DFT) calculation for the free energy change for PHB as it is degraded under water medium conditions.

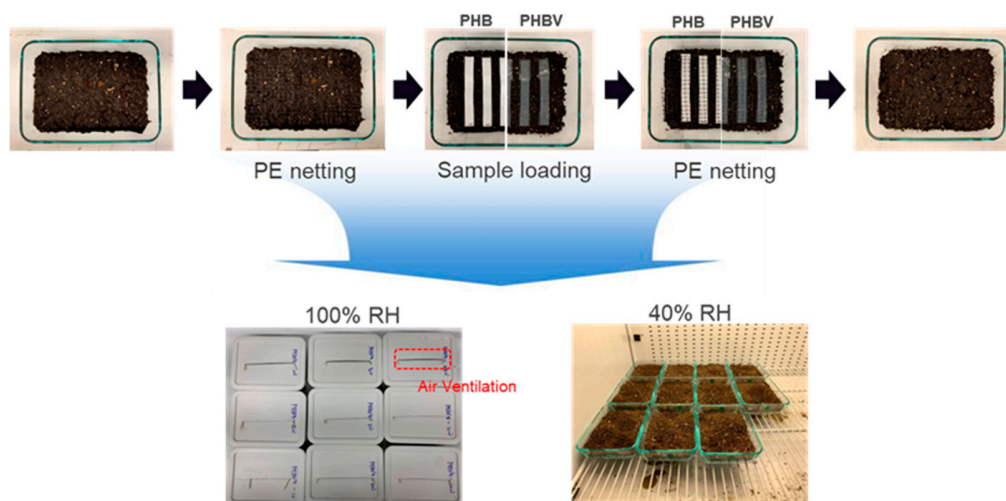

**Supplemental Figure S5.** The procedure used to prepare samples for the soil degradation experiment, in two different soil conditions of 100% RH and 40% RH.
